# Supplementary material for: Statistical methods and graphical displays of quality of life with survival outcomes in oncology clinical trials for supporting the estimand framework
Source: PubMed Central journal article supplement (PMC9531431; doi:10.1186/s12874-022-01735-1), 2022-10-04
Supplement: 12874_2022_1735_MOESM1_ESM.pdf [file 12874_2022_1735_MOESM1_ESM.pdf]

True QOL trajectory before death

True survival curve

Scenario 1

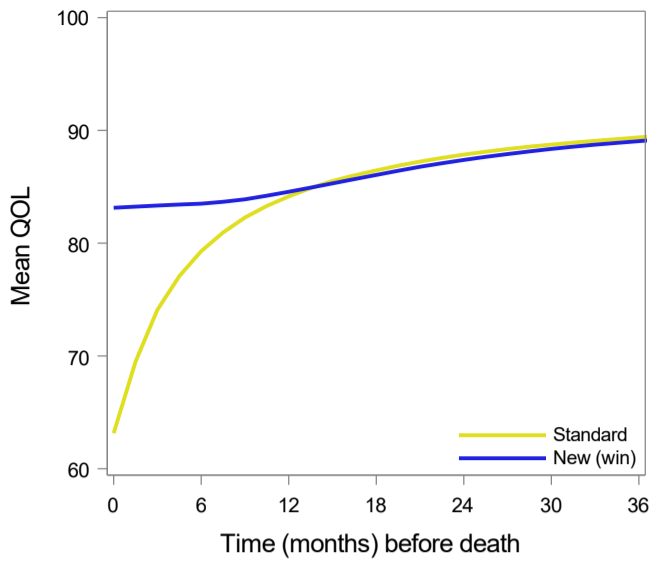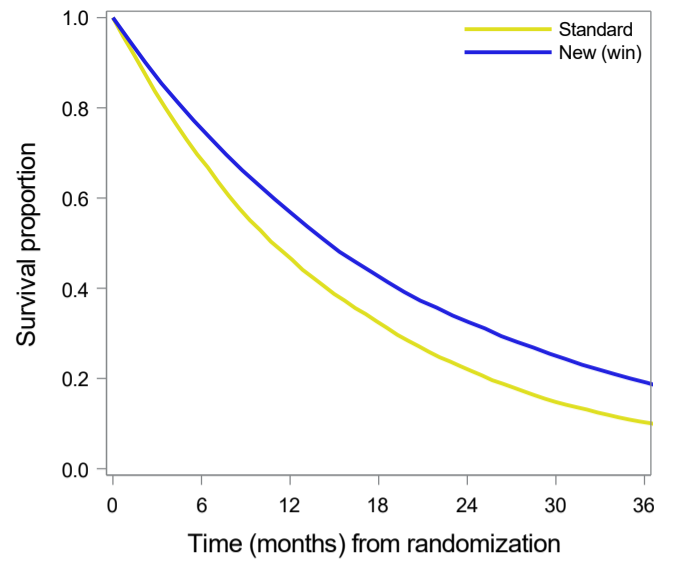

Scenario 2

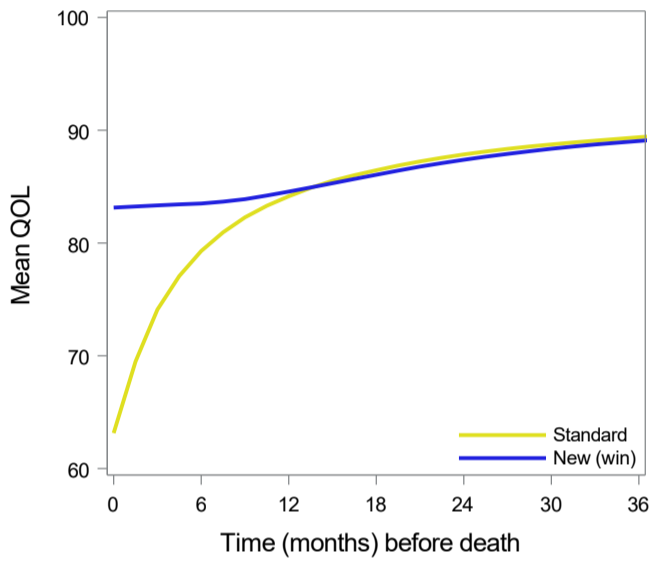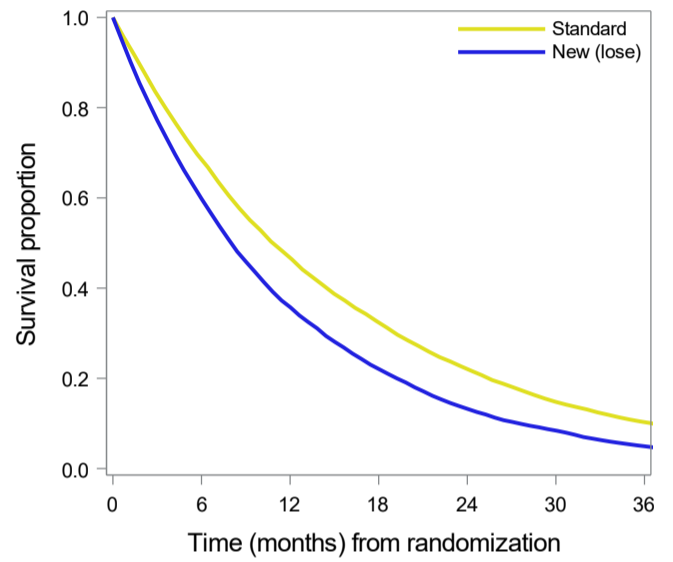

Scenario 3

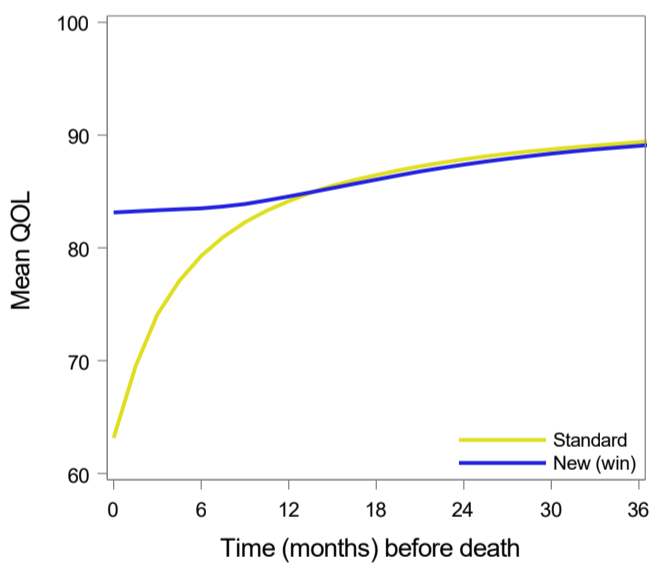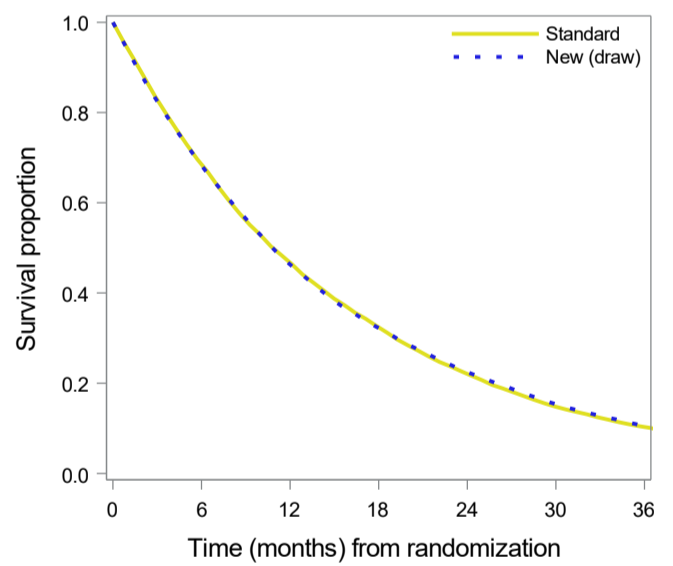

Scenario 4

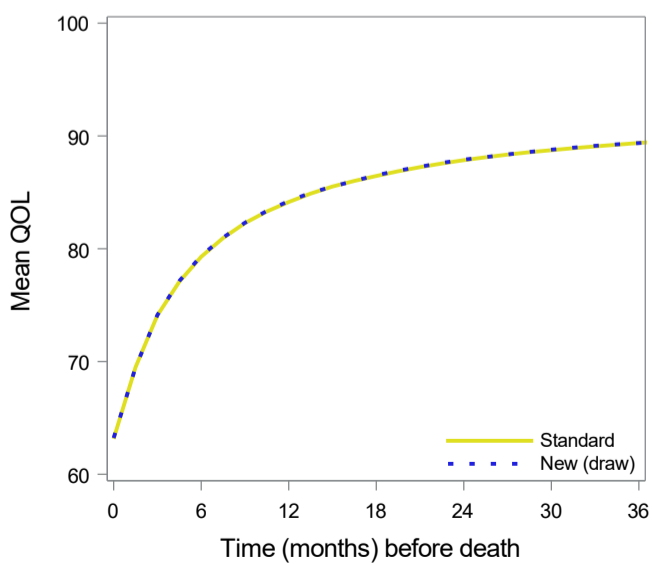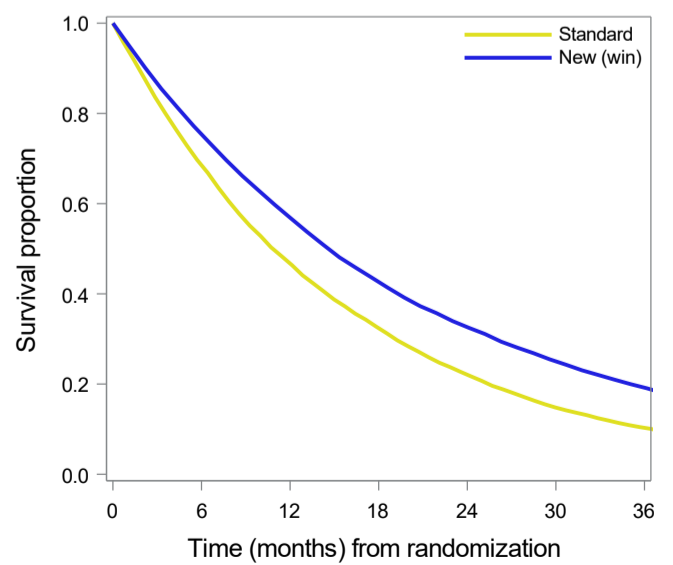

Supplementary Figure 1. Graphs for simulated data by scenarios  
Left: terminal trajectories of QOL; Right: survival curves.
